# Supplementary material for: Investigation of Al(TfO)3-based deep eutectic solvent electrolytes for aluminium-ion batteries. Part I: understanding the positively charged Al complex formation
Source: Royal Society of Chemistry journal article supplement (doi:10.1039/d1cp01711j), 2021-01-01
Supplement: d1cp01711j1.pdf [file d1cp01711j1.pdf]

ARTICLE

**Supplementary Information**

**Investigation of Al(TfO)<sub>3</sub> based deep eutectic solvent electrolytes for aluminium-ion battery. Part I: Understanding positive Al complex formation†**

Willi Peters,<sup>a</sup> Huong Thu Duong,<sup>a</sup> Soobin Lee<sup>a</sup> and Jean-Francois Drillet<sup>a,\*</sup>

<sup>a</sup> DEHEMA Research Institute, Batteries & Fuel Cells, 60486 Frankfurt am Main, Germany; \* E-mail: jean.drillet@dechema.de

**Physical properties of electrolyte components:**

Table S1 – Physical properties of all electrolyte components; \* solid at room temperature; \*\* decomposition temperature; \*\*\* 70% urea mixture with water. The following literature has been used: (a) Merck, Safety data sheet CAS:607-194-00-1; (b) E. AVCI: J. Inno Sci Eng 1 (2017) 25; (c) S. C. DeVito et al., Encyclopedia of Chemical Technology. (1999-2014). John Wiley & Sons; (d, f) J. A. Riddich et al. Techniques of Chemistry 4, 2 (1985), 658; (e) S. Halonen et al. Emiss. Control Sci. Technol. 3, (2017), 161-170

| Used electrolyte components<br>(incl. abbreviations)               | Molar Mass<br>g mol <sup>-1</sup> | Melting point<br>°C | Boiling point<br>°C | Viscosity at 20 °C<br>mPas       |
|--------------------------------------------------------------------|-----------------------------------|---------------------|---------------------|----------------------------------|
| Propylene carbonate (PC)                                           | 102.09                            | - 48.8              | 242                 | 2.51 (@25 °C) <sup>(a)</sup>     |
| Formamide (FA)                                                     | 45.04                             | 2                   | 210                 | 3.75 <sup>(b)</sup>              |
| Acetonitrile (ACN)                                                 | 41.05                             | - 45                | 82                  | 0.36 <sup>(c)</sup>              |
| N-Methylacetamide (NMA or N)                                       | 73.09                             | 27 - 30             | 206 - 208           | 3.01 (@ 40°C)* <sup>(d)</sup>    |
| Urea (U)                                                           | 60.06                             | 133 **              | 133 **              | 1.23 (@80°C)*** <sup>(e)</sup>   |
| Acetamide (AcAm or A)                                              | 59.07                             | 65 - 81             | 222 **              | 2.182 (@91.1°C) * <sup>(f)</sup> |
| Aluminiumtrifluoromethanesulfonate<br>(Al(TfO) <sub>3</sub> or AT) | 474.19                            | 300                 | -                   | -                                |

**Water content determination via volumetric Karl-Fischer titration:**

Table S2 – Water content determination of single components and Al(TfO)<sub>3</sub>-free mixtures via Karl-Fischer-Titration; \* Component dried with molecular sieve

| Components<br>(incl. abbreviations) | Composition<br>% | Measured water content |       |
|-------------------------------------|------------------|------------------------|-------|
|                                     |                  | ppm                    | %     |
| NMA*                                |                  | 101                    | 0.010 |
| FA*                                 |                  | 29                     | 0.003 |
| PC*                                 |                  | 19                     | 0.002 |
| NMA* / Urea                         |                  | 999                    | 0.100 |
| NMA* / Urea*                        |                  | 25                     | 0.002 |
| NMA*/AcAm                           |                  | 1412                   | 0.141 |
| NMA*/AcAm*                          |                  | 113                    | 0.011 |
| FA* /Urea*                          |                  | 255                    | 0.025 |

All solvents were dried down to 100 ppm and below by using a molecular sieve. Drying of the hygroscopic urea and acetamide with a molecular sieve reduced water amount significantly from 999 to 25 ppm and from 1412 to 113 ppm, respectively. Volumetric KFT technique is, however, unsuitable for mixtures containing Al(TfO)<sub>3</sub> salt since the latter reacts with the titration substance iodine.

## Full Raman spectrum:

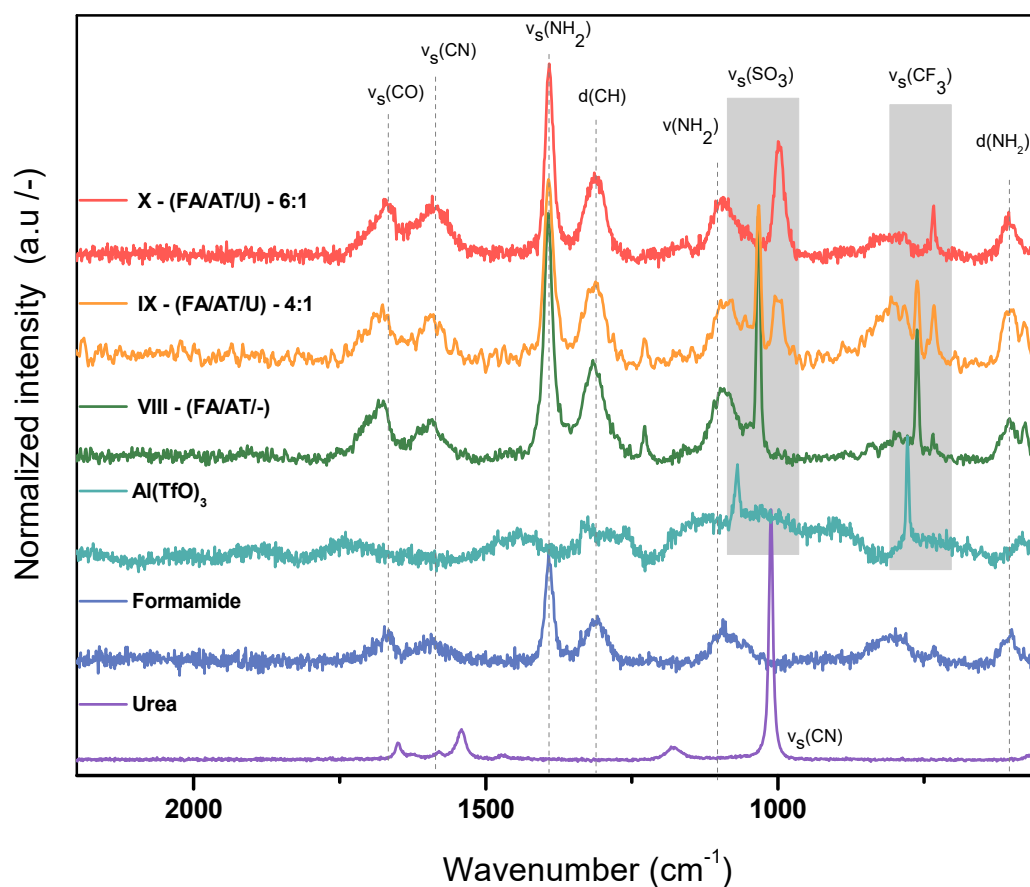

Figure S1 – Raman spectra of all FA-based single components as well as binary and ternary mixtures corresponding to Fig. 5b with an increased measurement range from 100 to 2400  $\text{cm}^{-1}$

## Raman measurement summary: TfO peak positions

Table S3 – Summary of  $\text{SO}_3$  and  $\text{CF}_3$  peak positions for single, binary and ternary electrolyte mixtures determined via Raman spectroscopy; Prominent peaks intensity are printed in bold; <sup>a</sup>ACN and PC are partially immiscible with urea – inhomogeneous mixtures were measured nonetheless; <sup>b</sup>mixture with urea/AT ratio of 6:1. all other ternary mixtures were measured at a ratio of 4:1; Peak position is correlated to single-charged (\*) or twofold-charged (#) positive Al-ion complex.

|             |                                                     | $\text{SO}_3$ $\text{cm}^{-1}$ |      |             | $\text{CF}_3$ $\text{cm}^{-1}$ |            |            |
|-------------|-----------------------------------------------------|--------------------------------|------|-------------|--------------------------------|------------|------------|
|             |                                                     | solid                          | (#)  | (*)         | solid                          | (*)        | (#)        |
| -           | $\text{Al}(\text{TfO})_3$                           | <b>1070</b>                    | -    | -           | <b>778</b>                     | -          | -          |
| <b>VII</b>  | NMA / $\text{Al}(\text{TfO})_3$                     | -                              | -    | <b>1032</b> | -                              | <b>761</b> | -          |
| <b>V</b>    | NMA / $\text{Al}(\text{TfO})_3$ / Urea              | -                              | 1041 | <b>1032</b> | -                              | 761        | <b>732</b> |
| <b>I</b>    | NMA / $\text{Al}(\text{TfO})_3$ / AcAm              | -                              | -    | <b>1032</b> | -                              | 761        |            |
| <b>VIII</b> | FA / $\text{Al}(\text{TfO})_3$                      | -                              | -    | <b>1032</b> | -                              | <b>761</b> | 734        |
| <b>IX</b>   | FA / $\text{Al}(\text{TfO})_3$ / Urea               | -                              | -    | <b>1032</b> | 999                            | <b>761</b> | 734        |
| <b>X</b>    | FA / $\text{Al}(\text{TfO})_3$ / Urea <sup>b</sup>  | -                              | -    | -           | 999                            | -          | <b>734</b> |
| <b>XI</b>   | ACN / $\text{Al}(\text{TfO})_3$                     | -                              | -    | -           | -                              | -          | <b>734</b> |
| -           | ACN / $\text{Al}(\text{TfO})_3$ / Urea <sup>a</sup> | -                              | -    | 1032        | -                              | <b>761</b> | 734        |
| <b>XII</b>  | PC / $\text{Al}(\text{TfO})_3$                      | -                              | -    | <b>1032</b> | -                              | <b>761</b> | -          |
| -           | PC / $\text{Al}(\text{TfO})_3$ / Urea <sup>a</sup>  | -                              | -    | <b>1032</b> | -                              | <b>761</b> | -          |

The comparison of  $\text{CF}_3$  and  $\text{SO}_3$  peaks in the Raman spectra shows a clear trend to lower wave numbers for all measured electrolytes.

### Raman spectra of NMA/AcAm mixtures with $\text{Al}(\text{NO}_3)_3$ or $\text{Al}(\text{TfO})_3$ salt:

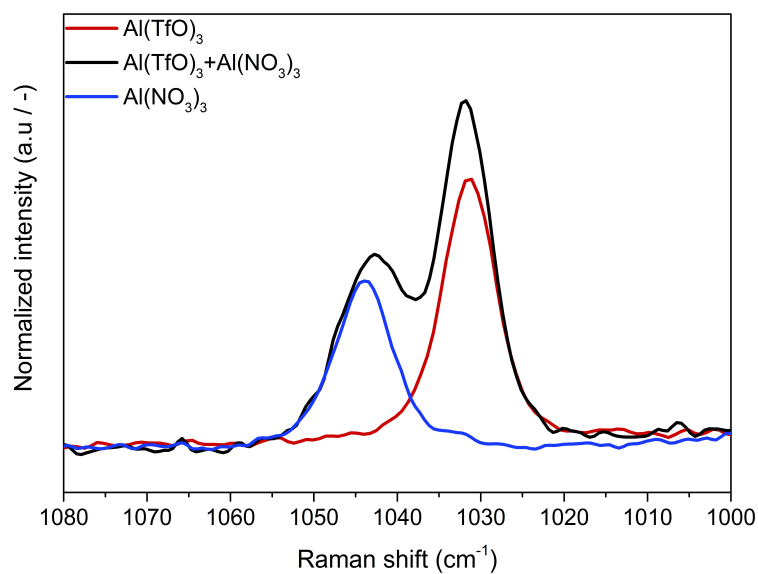

Figure S2 – Raman spectra of electrolytes containing  $\text{Al}(\text{TfO})_3$  a/o  $\text{Al}(\text{NO}_3)_3$ : Black: NMA/ $\text{Al}(\text{TfO})_3$ / $\text{Al}(\text{NO}_3)_3$ /AcAm; Red: NMA/ $\text{Al}(\text{TfO})_3$ /AcAm; Blue: NMA/ $\text{Al}(\text{TfO})_3$ /AcAm

Nitrate containing DES depicts a clear peak at higher wave numbers, due to their stronger association to the Al-ion. This is supported by NMR data, where an aqueous  $\text{Al}(\text{NO}_3)_3$  solution was used as reference.

### Temperature dependence of binary and ternary electrolytes:

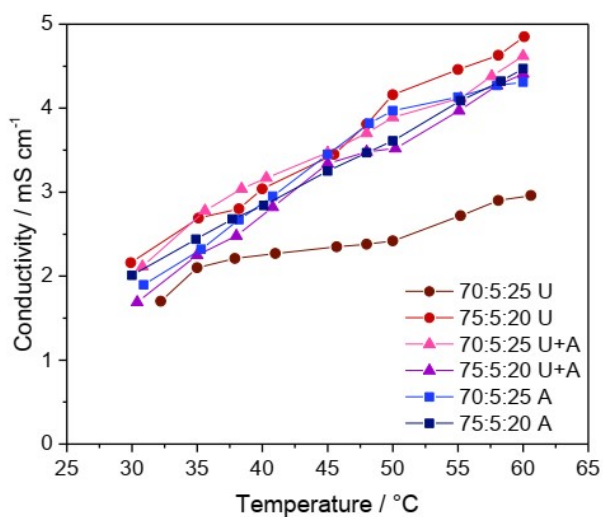

Figure S3 – Conductivity of DES based on HBD type and content
